# Supplementary material
Source: ML conference proceedings conference paper supplement (https://openreview.net/forum?id=ROEwZAxqyS)
Supplement: supplementary_material [file TiMi_architecture.pdf › TiMi_supplementary_material/TiMi_architecture.pdf]

# OFFLINE ENVIRONMENT

## I. Policy Stage

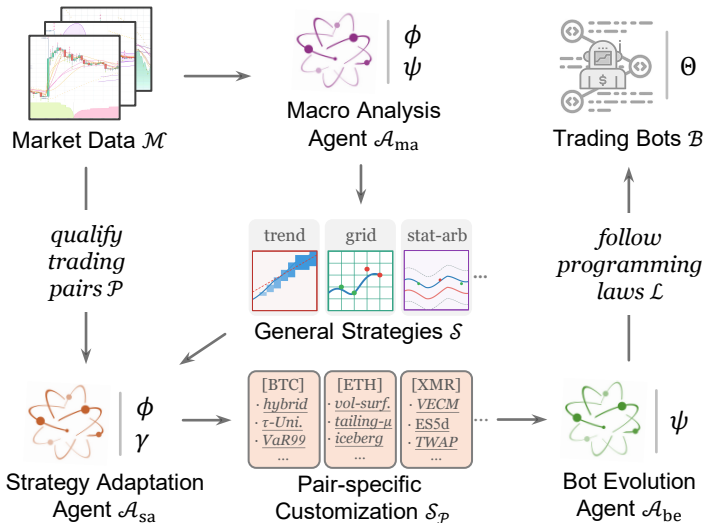

## II. Optimization Stage

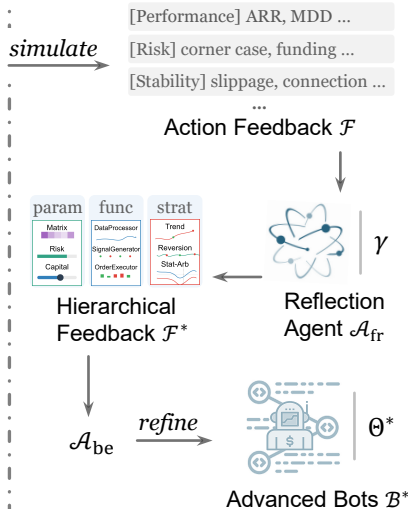

# LIVE ENVIRONMENT

## III. Deployment Stage

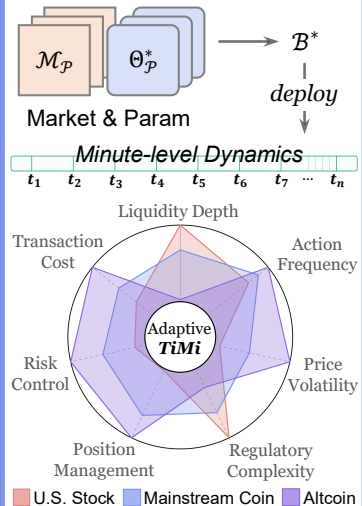

**REQ:** Specialized LLM Capabilities @ Semantic Analysis  $\phi$  • Code Programming  $\psi$  • Mathematical Reasoning  $\gamma$

**REQ:** Tuned Bots  $\mathcal{B}^*$  • Parameter  $\Theta^*$
